# Supplementary material for: Electron Transport Layer-Free Ruddlesden–Popper Two-Dimensional Perovskite Solar Cells Enabled by Tuning the Work Function of Fluorine-Doped Tin Oxide Electrodes
Source: MDPI journal article supplement (doi:10.3390/cryst12081090), 2022-08-04
Supplement: s1 [file s1]

Supplementary Materials

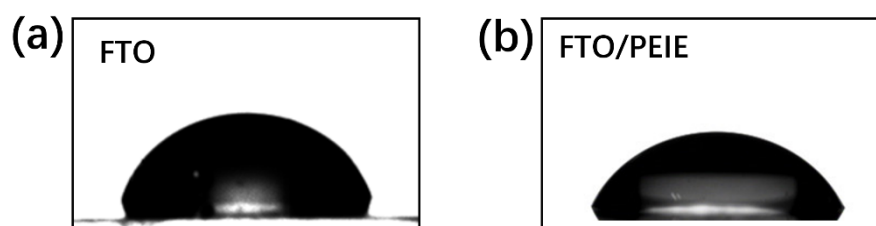

Figure S1. Contact angle measurements of (a) bare FTO and (b) PEIE coated FTO substrates.

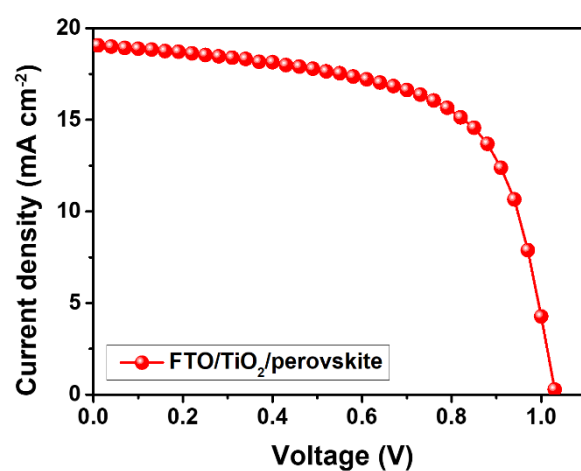

Figure S2. *J*-*V* characteristics of the PSCs using TiO<sub>2</sub> as the ETL.

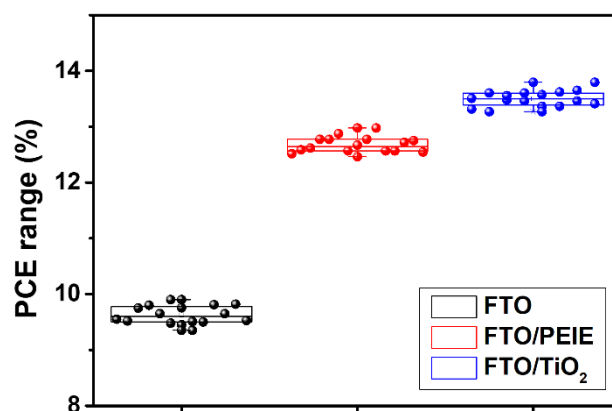

Figure S3. PCE trend with standard deviations for PSCs fabricated on bare FTO, FTO/PEIE and FTO/TiO<sub>2</sub> substrates.
